# Supplementary material for: Shallow boundary layer heights controlled by the surface-based temperature inversion strength are responsible for trapping home heating emissions near the ground level in Fairbanks, Alaska
Source: Copernicus journal article supplement (doi:10.5194/egusphere-2023-3082), 2024-01-03
Supplement: Supplementary file 1 [file egusphere-2023-3082-supplement.pdf]

1 *Supplement of*

2 **Modeling of pollution in Fairbanks, Alaska, shows shallow trapping heights controlled by**  
3 **the surface-based temperature inversion strength.**

4 **Meeta Cesler-Maloney et al.**

5 Correspondence to: Meeta Cesler-Maloney ([m.ceslermaloney@gmail.com](mailto:m.ceslermaloney@gmail.com)), William R. Simpson  
6 ([wrsimpson@alaska.edu](mailto:wrsimpson@alaska.edu))

7 **Measurements of trace gases from the CTC site and Birch Hill**

8 In addition to the SO<sub>2</sub> and CO<sub>2</sub> gases discussed in the text, CO, O<sub>3</sub> and NO<sub>x</sub> were also  
9 measured in the same larger stationary trailer parked next to the CTC building at the CTC site  
10 where SO<sub>2</sub> was measured. The same 3 m AGL inlet was used to deliver air to the Thermo Scientific  
11 CO (48C), O<sub>3</sub> (49C), NO<sub>x</sub> (42C) and SO<sub>2</sub> (43C) gas analyzers. The CO analyzer was calibrated  
12 using the same EPA certified mixed standard of 5.190 micromole mole<sup>-1</sup> SO<sub>2</sub> and 508.4  
13 micromole mole<sup>-1</sup> CO and the same calibration procedure as described in the text for SO<sub>2</sub>; an  
14 overflow of either zero air, or standard gas diluted in zero air at multiple calibration mixing ratios,  
15 was sent to the inlet of the analyzers at calibration times.

16 To calibrate the O<sub>3</sub> analyzer, O<sub>3</sub> was generated using the Environics 9100 calibration  
17 dilution system, which contains an O<sub>3</sub> generator. A zero and multipoint calibration was performed  
18 by overflowing the inlet with zero air, or air containing O<sub>3</sub> generated by the calibration dilution  
19 system at multiple mixing ratios. The NO<sub>x</sub> analyzer was calibrated in the same way as the other  
20 instruments, by overflowing the inlet with either zero air or standard gas diluted in zero air. An  
21 EPA certified NO standard of 50.12 micromole mole<sup>-1</sup> NO and 50.16 micromole mole<sup>-1</sup> NO<sub>x</sub> was  
22 used to calibrate the NO measurement on the analyzer or was mixed with O<sub>3</sub> generated by the  
23 calibration dilution system to produce a known mixing ratio of NO<sub>2</sub> to calibrate the NO<sub>2</sub>

24 measurement on the analyzer. All four analyzers (CO, O<sub>3</sub>, NO<sub>x</sub> and SO<sub>2</sub>) were corrected in the  
25 same way as described in the text for SO<sub>2</sub>, by first subtracting the instrument's average  
26 measurement during the zero and then applying a correction factor to the data, which is the slope  
27 from the zero-intercept linear correlation of the instrument observations to the known calibration  
28 standard mixing ratios from the multipoint calibrations. Calibration zeroes and slopes fits were  
29 linearly interpolated through the data between calibrations.

30         There were times in the CTC site O<sub>3</sub> time series where O<sub>3</sub> was present at non-zero mixing  
31 ratios when O<sub>3</sub> was expected to be fully titrated by the large amounts of NO present. This may be  
32 due to an interference from species that absorb light in the same region as O<sub>3</sub>. To account for this  
33 discrepancy, a secondary correction was applied to the CTC site O<sub>3</sub> data in addition to the  
34 multipoint calibration correction. The median value of O<sub>3</sub> at the CTC site at times when there was  
35 enough NO available to fully titrate O<sub>3</sub> (NO > 20 nanomole mole<sup>-1</sup>) was subtracted from the O<sub>3</sub>  
36 data to account for possible interferences.

37         A second O<sub>3</sub> analyzer (Teledyne 400E) was deployed at Birch Hill in a building with an  
38 inlet at 158 m AGL. There was only one O<sub>3</sub> generator available during the field campaign, so the  
39 O<sub>3</sub> analyzer at Birch Hill did not undergo routine zeroes and multipoint calibrations. Instead, the  
40 Teledyne 400E O<sub>3</sub> analyzer at was brought down from Birch Hill to the CTC site at 158 m AGL  
41 and placed on the same 3 m inlet as the Thermo Scientific 49C O<sub>3</sub> analyzer for inter-comparison  
42 for roughly ten days from March 3<sup>rd</sup> to March 17<sup>th</sup>, 2022 at the CTC site. The Teledyne 400E O<sub>3</sub>  
43 was subtracted from the Thermo 49C O<sub>3</sub> to obtain an offset during the period of co-location and  
44 the average offset during the colocation of 6.56 nanomole mole<sup>-1</sup> O<sub>3</sub> was subtracted from the full  
45 Teledyne 400E O<sub>3</sub> dataset to obtain the corrected Birch Hill O<sub>3</sub> observation.

46

47 **Determination of CO<sub>2</sub> background mixing ratio**

48 Figure S1 shows a plot of hourly CO<sub>2</sub> versus SO<sub>2</sub> mixing ratios, both measured at 3 m at  
49 the CTC building. The intercept is interpreted to be the CO<sub>2</sub> background mixing ratio surrounding  
50 Fairbanks, so a background CO<sub>2</sub> mixing ratio of 420 micromole mole<sup>-1</sup> was used in the model. The  
51 slope in Figure S1 represents the empirical emissions ratio of 4300 moles CO<sub>2</sub> to 1 mole SO<sub>2</sub> that  
52 was used in the model.

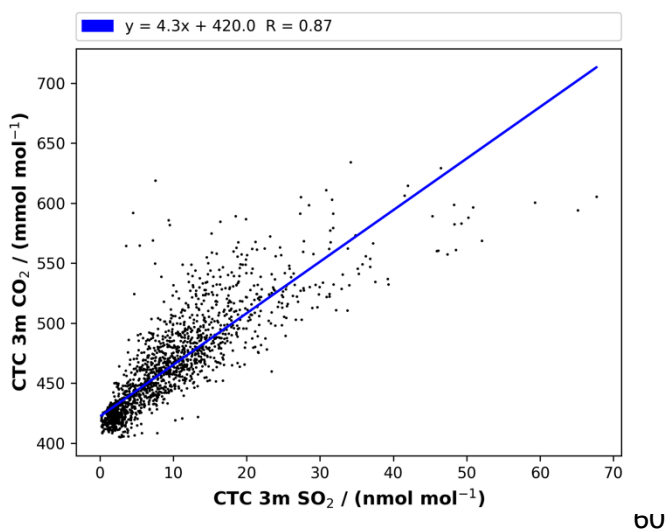

**Figure S1.** Free-intercept linear correlation plot of hourly CO<sub>2</sub> in micromole mole<sup>-1</sup> (mmol mol<sup>-1</sup> is an abbreviation for micromole mole<sup>-1</sup>) versus SO<sub>2</sub> in nanomole mole<sup>-1</sup>, both measured at the 3 m at the CTC building.

61 **Additional model diagnostics**

62 Table S1 shows the free-intercept linear correlation slopes, intercepts and R values for the  
63 “Base” model simulation and each model sensitivity test.

64

65 **Table S1.** Free intercept linear correlation coefficients. Intercepts are in nanomole mole<sup>-1</sup>.

| <b>Variation</b>                                | <b>LP-DOAS<br/>Free intercept R</b> | <b>LP-DOAS<br/>Slope and<br/>intercept</b> | <b>3 m in-situ<br/>Free intercept R</b> | <b>3 m in-situ<br/>Slope and<br/>intercept</b> | <b>Free intercept<br/>Slope ratio P1/P0</b> |
|-------------------------------------------------|-------------------------------------|--------------------------------------------|-----------------------------------------|------------------------------------------------|---------------------------------------------|
| Base                                            | 0.88                                | 1.02 + 0.79                                | 0.81                                    | 1.01 + 3.73                                    | 0.75                                        |
| $h = \frac{2}{3} h_{\text{base}}$               | 0.87                                | 1.56 – 0.66                                | 0.82                                    | 1.66 + 2.93                                    | 0.42                                        |
| $h = 1.5 h_{\text{base}}$                       | 0.86                                | 0.68 + 1.58                                | 0.80                                    | 0.63 + 3.94                                    | 1.21                                        |
| $L = \frac{2}{3} L_{\text{base}}$               | 0.88                                | 0.76 + 0.56                                | 0.80                                    | 0.74 + 3.38                                    | 0.73                                        |
| $L = 1.5 L_{\text{base}}$                       | 0.87                                | 1.38 + 1.13                                | 0.82                                    | 1.38 + 3.95                                    | 0.77                                        |
| $h_{\text{neutral}} = \frac{2}{3} \text{ base}$ | 0.88                                | 1.03 + 0.93                                | 0.81                                    | 0.99 + 4.17                                    | 0.78                                        |
| $h_{\text{neutral}} = 1.5 \text{ base}$         | 0.87                                | 1.02 + 0.69                                | 0.81                                    | 1.02 + 3.40                                    | 0.73                                        |
| $u^* = 0.25 \text{ m s}^{-1}$                   | 0.88                                | 1.11 + 0.77                                | 0.82                                    | 1.10 + 4.88                                    | 0.71                                        |
| $u^* = 0.60 \text{ m s}^{-1}$                   | 0.87                                | 0.96 + 0.84                                | 0.80                                    | 0.95 + 2.95                                    | 0.78                                        |
| $E = \frac{2}{3} E_{\text{base}}$               | 0.88                                | 0.69 + 0.63                                | 0.81                                    | 0.68 + 2.60                                    | 0.75                                        |
| $E = 1.5 E_{\text{base}}$                       | 0.88                                | 1.54 + 1.04                                | 0.81                                    | 1.51 + 5.44                                    | 0.75                                        |

66

67 Figure S2 shows that the  $Kz$  profile in the region near ground level is similar when  
68 calculated using a SBL height,  $h$ , of 400 m or 600 m using Equation EQ1 for the SBL, and also  
69 when using the equation for a truly neutral boundary layer, which is equal to the von Hartmann  
70 constant multiplied by the friction velocity ( $0.4 \text{ m s}^{-1}$  here) and the altitude,  $z$ .

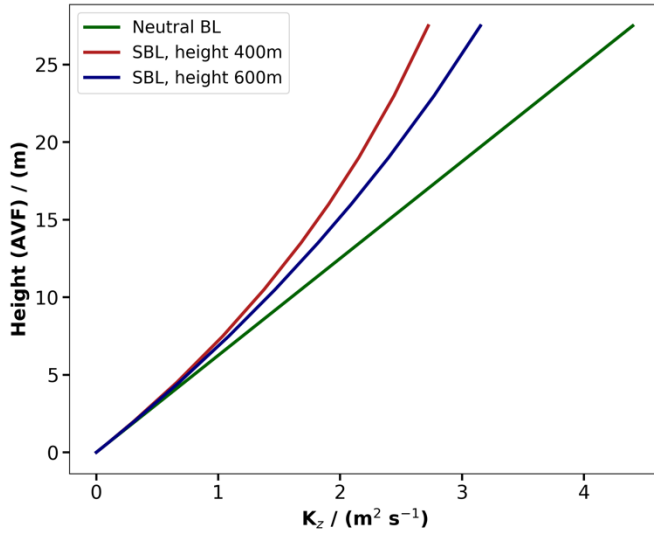

**Figure S2.** Comparison of  $K_z$  in the first 25 m AGL during stable boundary layer conditions, with an SBL height of 400 m and 600 m, as well as a  $K_z$  profile for the same altitude range calculated for a truly neutral boundary layer.

80 Figure S3 shows a zero-intercept linear correlation plot for the 3-hour modeled path 2 (P2)  
 81 averaged  $\text{SO}_2$  versus LP-DOAS observed path 2 averaged  $\text{SO}_2$  in the left panel, with the same  
 82 correlation plot for the 3-hour modeled path 3 (P3) averaged  $\text{SO}_2$  versus LP-DOAS observed path  
 83 3 averaged  $\text{SO}_2$  in the right panel.

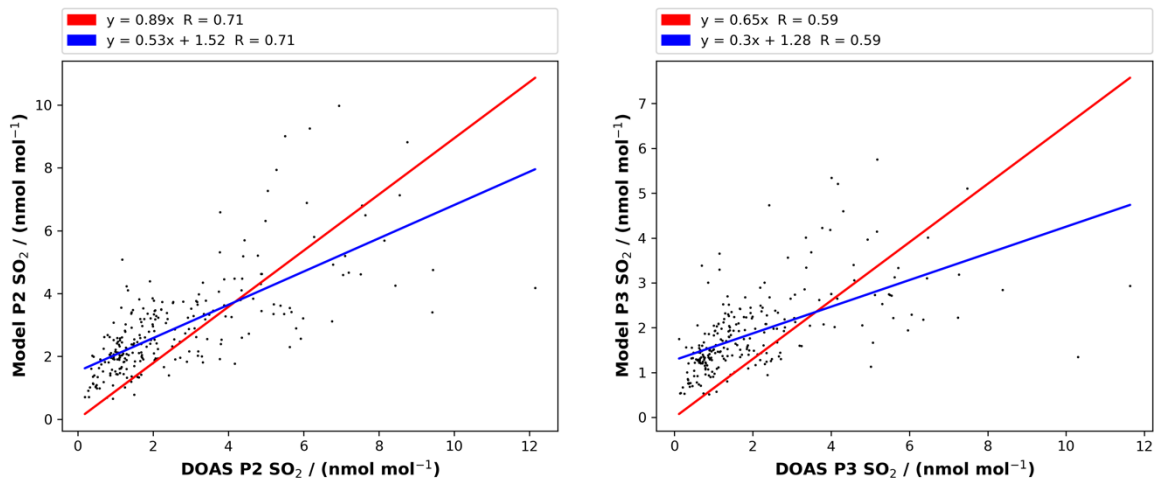

84  
 85 **Figure S3.** Linear correlation plots of 3-hour modeled path 2 (P2) averaged  $\text{SO}_2$  versus the LP-  
 86 DOAS observed path 2 averaged  $\text{SO}_2$  (left panel) and 3-hour modeled path 3 (P3) averaged  $\text{SO}_2$   
 87 versus the LP-DOAS observed path 3 averaged  $\text{SO}_2$  (right panel).

88 The path 2 data in the left panel of Figure S3 has a zero-intercept  $slope = 0.89$  and  $R = 0.71$   
89 and the path 3 data in the right panel has a zero-intercept  $slope = 0.65$  and  $R = 0.59$ . While the  
90 statistics for path 2 and path 3 are not as close to the ideal  $slope = 1.0$  and  $R = 1.0$  as the statistics  
91 for path 0 and path 1 in Figure 7 in the text, there is overall much less pollution observed in path 2  
92 and path 3, such that the overall model path average versus LP-DOAS observed path average  
93 statistics in Figure 7 are dominated by path 0 and path 1. Figure S4 shows the zero-intercept linear  
94 correlation plot for the LP-DOAS path 0 average  $SO_2$  versus the CTC 3 m in-situ  $SO_2$ .

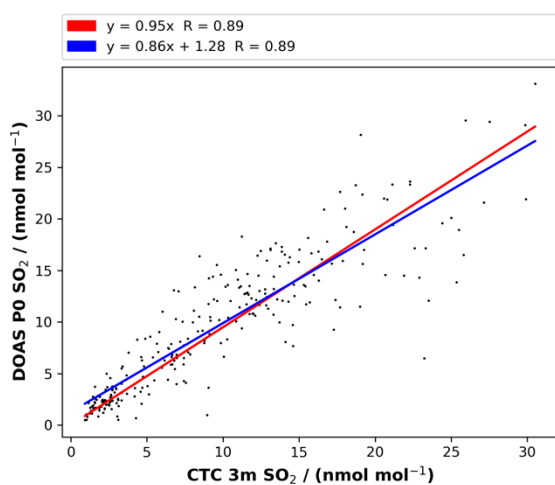

**Figure S4.** Linear correlation plot for the LP-DOAS path 0 (P0) average  $SO_2$  versus the CTC 3 m in-situ  $SO_2$ . Data is averaged at 3-hour time resolution.

102 Figure S5 shows the 3-hour averaged zero-intercept correlation plots for the modeled  
103 versus in-situ  $CO_2$  data at 3 m (left panel) and 23 m (right panel) at the CTC building. The slopes  
104 and R values in Figure S5 highlights that the model is also in good agreement with in-situ  
105 observations for another dispersion tracer,  $CO_2$ , across the CTC building height of 23 m. Figure  
106 S6 shows a time series of the steady state urban canopy and column export residence times  
107 calculated from the model flux outputs for the ALPACA “Base” simulation.

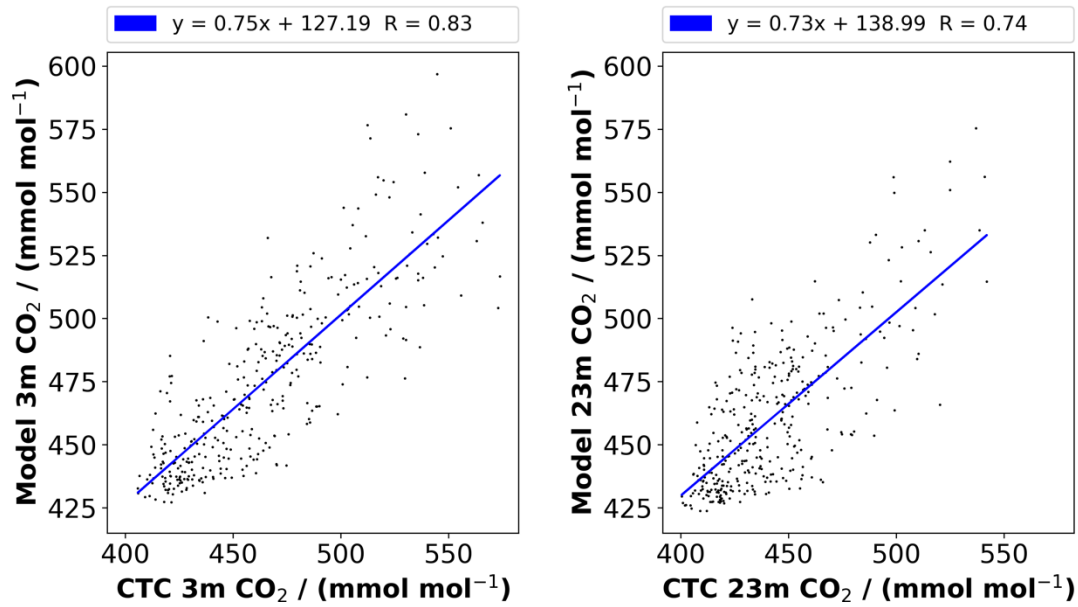

108

109 **Figure S5.** Free-intercept linear correlation plot for the modeled versus in-situ CO<sub>2</sub> in micromole  
 110 mole<sup>-1</sup> (mmol mol<sup>-1</sup> is an abbreviation for micromole mole<sup>-1</sup>) measured at the CTC building at both  
 111 3 m and 23 m AGL. Data is averaged at 3-hour time resolution.

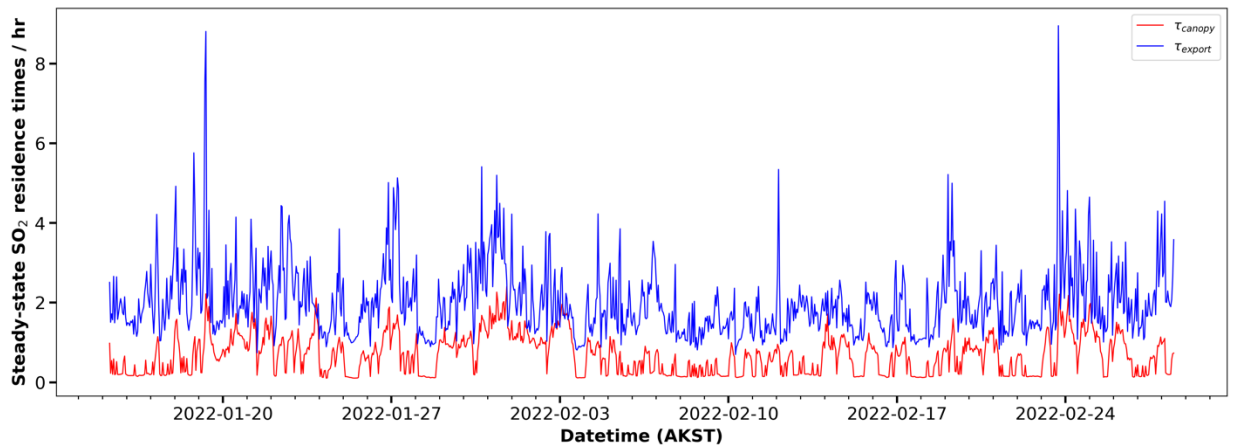

112

113 **Figure S6:** Time series of steady state calculated urban canopy (red) and column export (blue)  
 114 pollution residence times for the ALPACA “Base” simulation.
